# Supplementary material
Source: publisher figshare collection journal article supplement (https://future-science-group.figshare.com/ndownloader/files/30793375)
Supplement: Supplementary file 1 [file 30793375]

**Supplementary** **table 1. Empty SEP and DEP do not induce relevant immune activation.** MFI of the activation marker CD25, CD80 expression by monocytes, and cytokine levels in the culture supernatant following incubation of PBMCs with control DEP and control SEP. Concentrations are equivalent to the lowest and highest tested concentrations of the R848-loaded NPs, respectively. Mean ± SD of at least three independent experiments; *all replicates below lower limit of quantitation, as determined by Legendplex Software

|  |  | **control PLGA-DEP** | |  | **control PLGA-SEP** | |
| --- | --- | --- | --- | --- | --- | --- |
|  |  | **clow** | **chigh** |  | **clow** | **chigh** |
| **median fluorescence intensity [AU]** | **CD25** | 4744 ± 1189 | 5463 ± 410 |  | 4447 ± 572 | 5378 ± 710 |
| **CD80** | 2238 ± 315 | 2730 ± 33 |  | 2084 ± 749 | 2580 ± 963 |
|  |  |  |  |  |  |  |
| **ccytokine [pg/ml]** | **IL-1β** | *< LOQ** | 7.4 ± 2.4 |  | 89.8 ± 197.9 | 73.5 ± 45.6 |
| **TNF-α** | 2.2 ± 0.3 | 3.3 ± 1.3 |  | 21.1 ± 34.4 | 26.5 ± 21.9 |
| **IL-6** | 43.1 ± 48.0 | 162.8 ± 228.3 |  | 13.6 ± 6.1 | 493.0 ± 579.2 |
| **IL-10** | *< LOQ** | *< LOQ** |  | 7.7 ± 6.9 | 5.5 ± 0.6 |
| **IFNγ** | *< LOQ** | *< LOQ** |  | 329.7 ± 792.3 | 44.0 ± 71.4 |
| **IL-12p70** | *< LOQ** | *< LOQ** |  | *< LOQ** | 3.6 ± 0.3 |
